# Supplementary material for: In situ construction of a direct Z-scheme AgBr/α-Ag2WO4 heterojunction with promoted spatial charge migration and photocatalytic performance
Source: Royal Society of Chemistry journal article supplement (doi:10.1039/d0nj05965j), 2021-01-01
Supplement: d0nj05965j1.pdf [file d0nj05965j1.pdf]

## Electronic Supporting Information (ESI)

### ***In-situ* construction of direct Z-scheme AgBr/ $\alpha$ -Ag<sub>2</sub>WO<sub>4</sub> heterojunction with promoted spatial charge migration and photocatalytic performance**

Xiao-Ya Zhai<sup>a</sup>, Yi-Fan Zhao<sup>a</sup>, Guo-Ying Zhang<sup>a,b\*</sup>, Bing-Yu Wang<sup>a</sup>, Qi-Yun Mao<sup>a</sup>

*a Tianjin Key Laboratory of Structure and Performance for Functional Molecules;  
College of Chemistry, Tianjin Normal University, Tianjin 300387, P. R. China.*

*b Shandong Provincial Key Laboratory of Clean Production of Fine Chemicals; Key  
Laboratory of Molecular and Nano Probes, Ministry of Education, Shandong Normal  
University, Jinan 250014, P. R. China.*

---

\* Corresponding author.

E-mail address: hxxyzgy@tjnu.edu.cn (Guo-Ying Zhang)

**Table S1** The mass fraction in terms of AgBr or Br of various AgBr/AWO samples.

| AgBr/AWO-Samples | 3%   | 6%   | 13%  | 20%  | 24%   |
|------------------|------|------|------|------|-------|
| AgBr% (T)        | 3    | 6    | 13   | 20   | 24    |
| Br% (T)          | 1.28 | 2.55 | 5.53 | 8.51 | 10.21 |
| Br% (E)          | 1.22 | 2.37 | 5.92 | 8.24 | 9.61  |

“T” and “E” represent theoretical value and EDS experimental value, respectively.

**Table S2** The rate constants ( $k$ ) for degradation of RhB and phenol under different illumination conditions.

| Samples                | RhB<br>simulated sunlight<br>(min <sup>-1</sup> ) | RhB<br>visible light<br>(min <sup>-1</sup> ) | phenol<br>visible light<br>(min <sup>-1</sup> ) |
|------------------------|---------------------------------------------------|----------------------------------------------|-------------------------------------------------|
| AWO ( $k_1$ )          | 0.08480                                           | 0.01240                                      | 0.00095                                         |
| AgBr/AWO-20% ( $k_2$ ) | 1.05209                                           | 0.66223                                      | 0.02509                                         |
| $k_2/k_1$              | 12.4                                              | 53.4                                         | 26.4                                            |

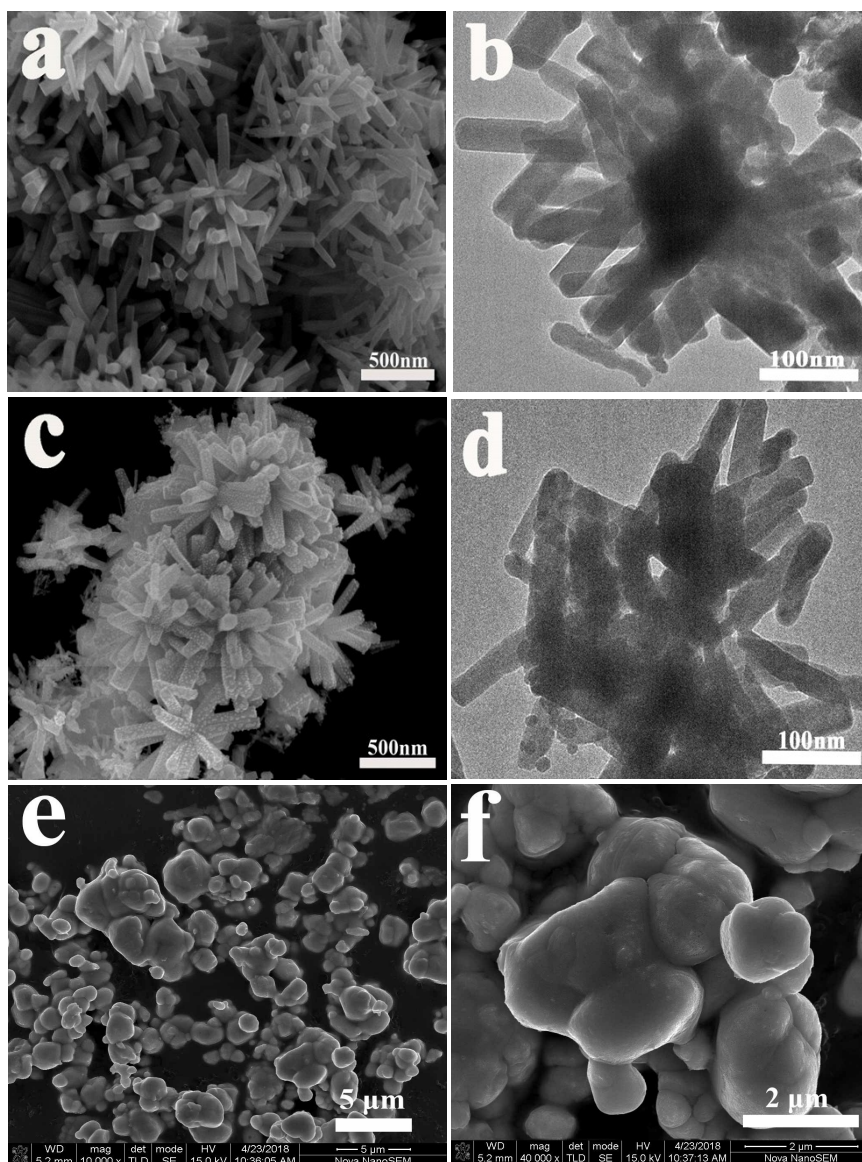

**Fig. S1** (a, b) SEM and TEM images of AWO clusters, (c, d) SEM and TEM images of AWO AgBr/AWO-20%, and (e-f) SEM images of AgBr microparticels.

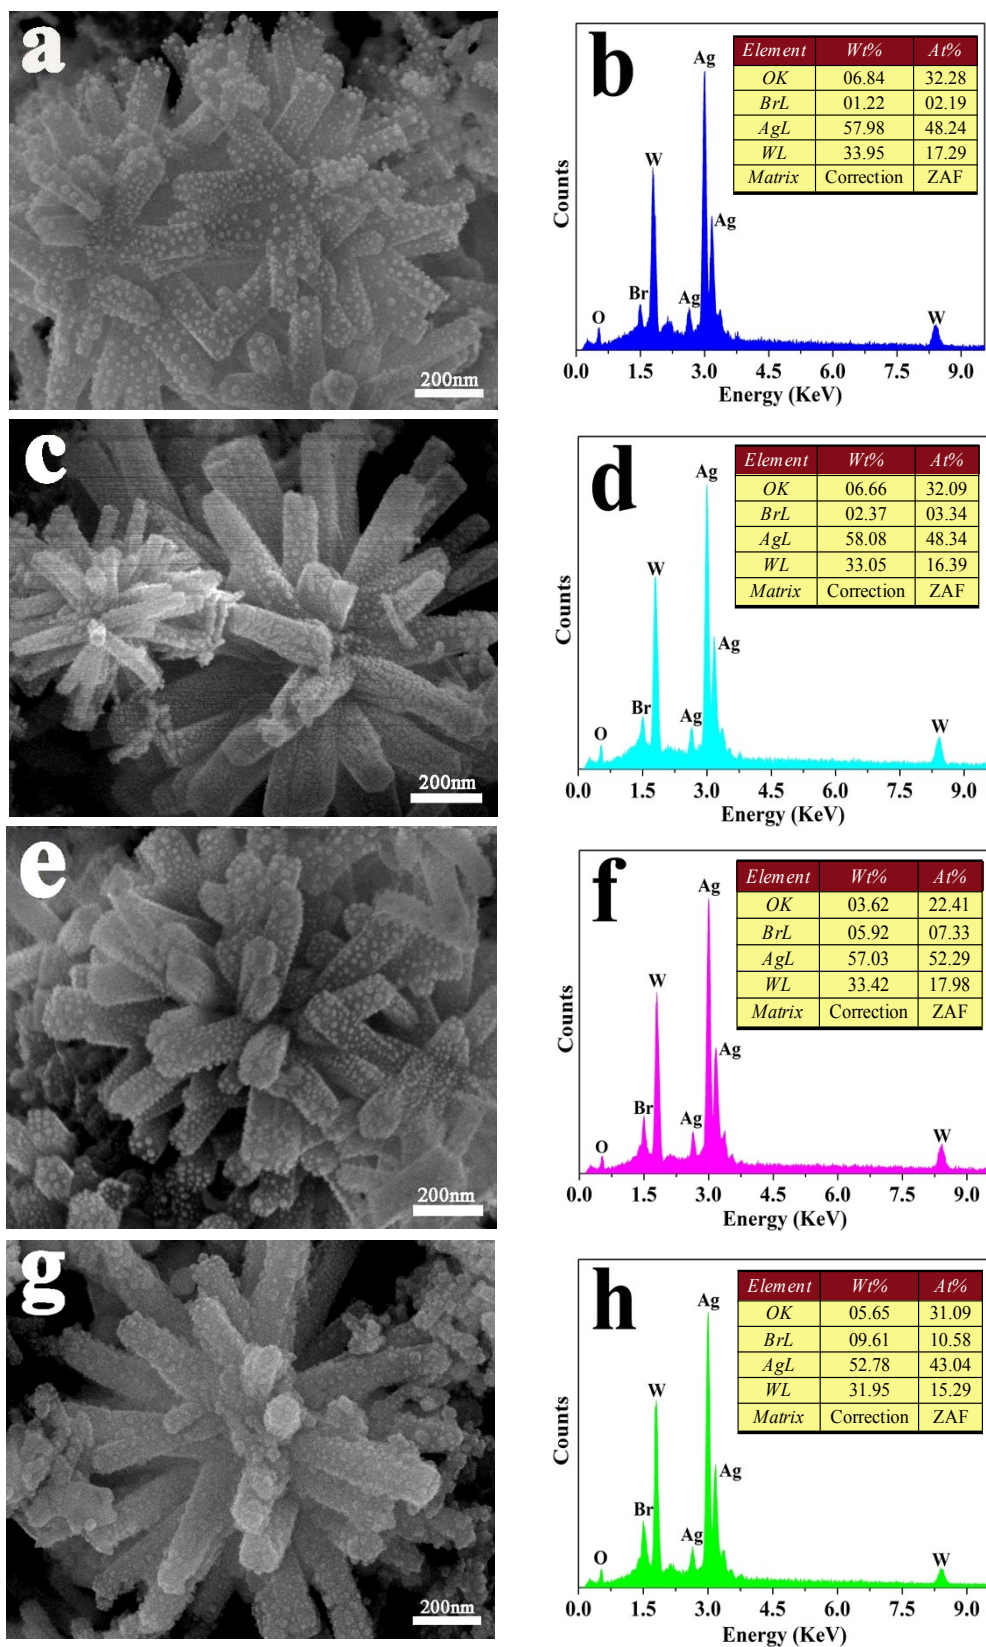

**Fig. S2** SEM images and corresponding EDS of the samples: (a, b) AgBr/AWO-3%, (c, d) AgBr/AWO-6%, (e, f) AgBr/AWO-13% and (g, h) AgBr/AWO-24%.

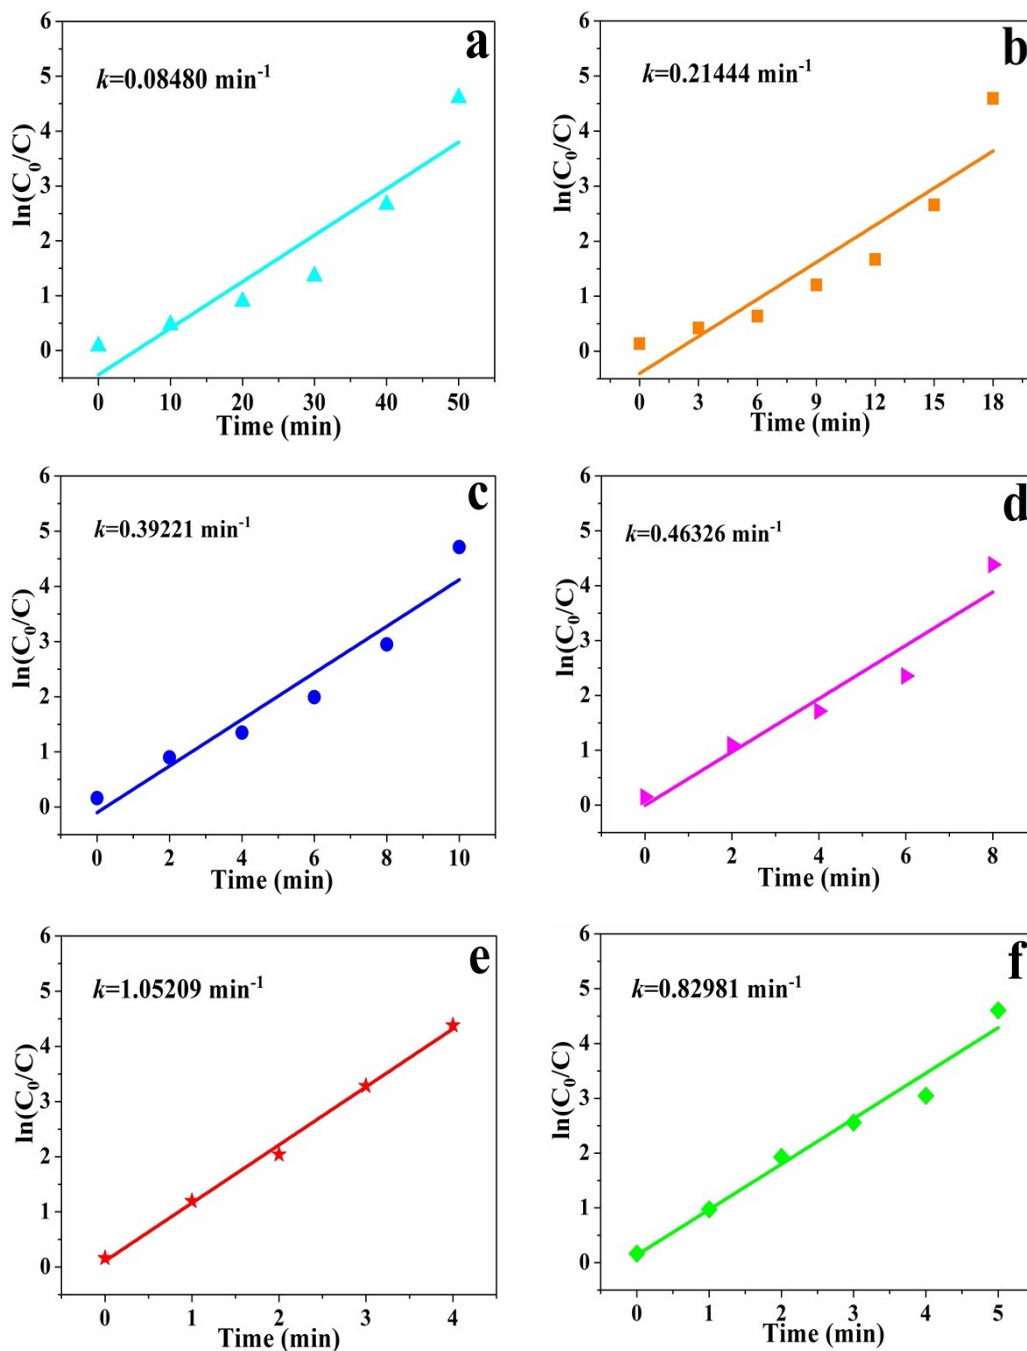

**Fig. S3 The quasi-first-order kinetic curves of AWO-based samples towards RhB degradation under simulated sunlight: (a) AWO, (b) AgBr/AWO-3%, (c) AgBr/AWO-6%, (d) AgBr/AWO-13%, (e) AgBr/AWO-20%, and (f) AgBr/AWO-24%.**

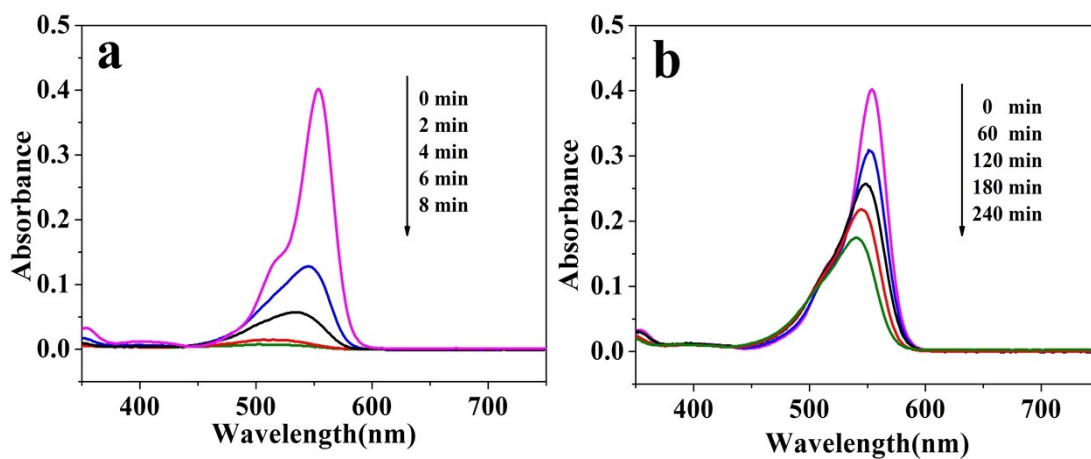

**Fig. S4** Temporal UV-vis absorption spectra of RhB solution under visible light irradiation in the presence of (a) AgBr/AWO-20% and (b) AWO, respectively.

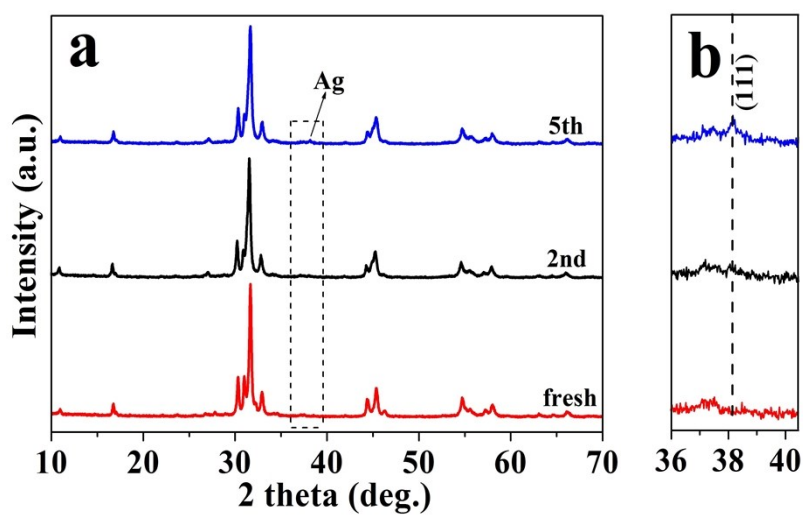

**Fig. S5** (a) XRD spectra of AgBr/AWO-20% after repeated photocatalytic experiments, (b) enlarged diffractions peaks in 2θ of 36-38°.

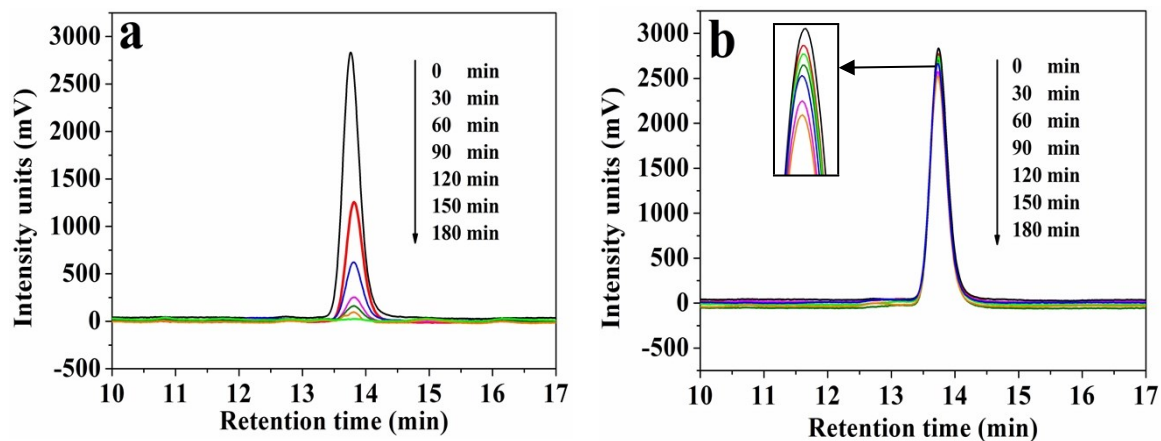

**Fig. S6 Temporal HPLC spectra of phenol under visible light irradiation in the photocatalysis of (a) AgBr/AWO-20% and (b) AWO, respectively.**

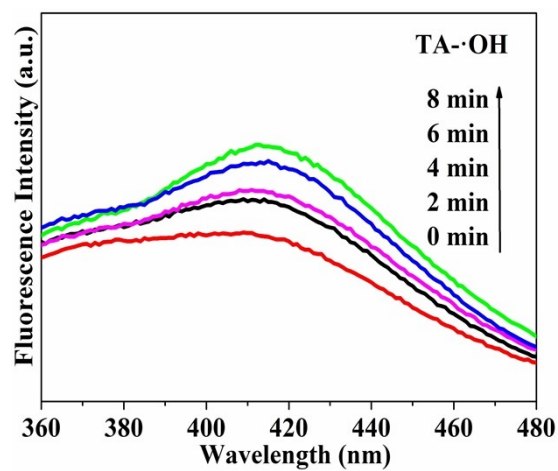

**Fig. S7 PL spectral changes with irradiation time in TA solution of  $5 \times 10^{-4}$  M over AgBr/AWO-20% (ex: 305 nm)**

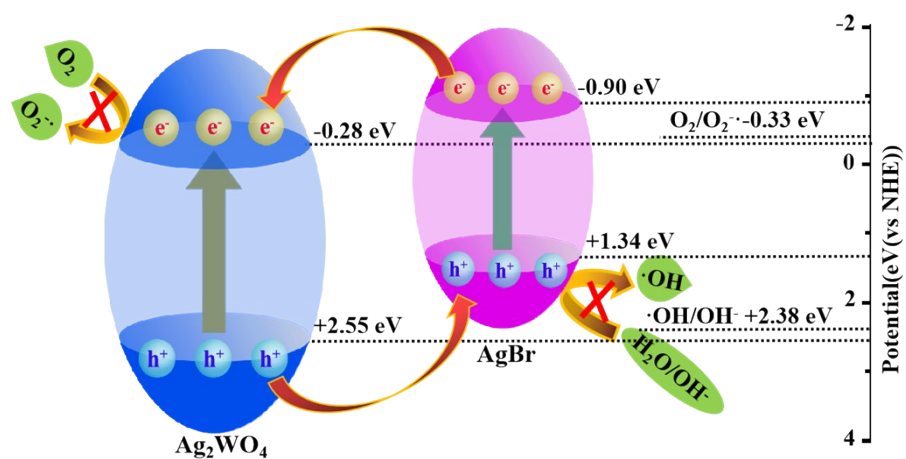

**Fig. S8** Schematic illustration for the impossible generation of  $\text{O}_2^{\cdot-}$  and  $\text{OH}^{\cdot}$  in a hypothetical II-type AWO/AgBr heterojunction.
